# Supplementary material
Source: PubMed Central journal article supplement (PMC3026719)
Supplement: JCI42656sd.pdf [file JCI42656sd.pdf]

## Supplementary Figure Legends

**Supplementary Figure 1. Characterization of Ad-siA20 vector.** (A) Schematic diagrams of recombinant adenoviral vectors. The small hairpin mouse A20 siRNA oligo duplexes (5'-GATCCCCCAAAGCACTTATTGACAGATTCAAGAGATCTGTCAATAAGTGCTTTGTTTT TGGAAA-3') were first cloned into SpeI and ClaI-cut pSuper vector. The recombinant Ad vector Ad-siA20 was constructed to express siA20 by inserting the H1 RNA polymerase promoter-siA20 DNA fragment into the PacI-cut Ad-Easy shuttle vector. A control recombinant vector expressing siGFP under the H1 promoter was also constructed. (B) Transfection efficiency of BM-DCs with different MOIs (ifu) of a recombinant Ad viruses expressing GFP marker. (C) Downregulation of A20 mRNA in BM-DCs transduced with different MOIs (ifu) of Ad-siA20 with or without LPS stimulation (100 ng/ml for 18 hr) by qRT-PCR (Left panel). Mean fluorescent intensity of intracellular A20 protein staining with the anti-A20 antibody (Santa Cruz Biotechnology, #sc-32523) of Ad-siGFP and Ad-siA20-BM-DCs (MOI of 1000 ifu) with or without LPS stimulation (100 ng/ml for 18 hr) (Right panel).

**Supplementary Figure 2. Comparison of Ad-siA20-BM-DC and gp120 protein/IFA systemic immunization.** Groups of C57BL/6 mice (n=4-6) were systemically immunized with Ad-transduced BM-DCs pulsed with gp120 (10 µg/ml) or gp120 proteins formulated in IFA (10 µg/mouse) via footpads followed by i.p. administration of PolyI:C (50 µg/mouse) twice at a

weekly interval. Two weeks after the second immunization, the mice were sacrificed and gp120-specific mucosal T cell responses were analyzed by ICS of mesenteric LN cell suspensions (A). Vaginal lavages were collected to determine gp120-specific IgA response by ELISA (B). The data are presented from one representative experiment of two independent experiments.

**Supplementary Figure 3. In vitro primed OT-II cells by Ad-siA20 DCs enhance migration to the secondary lymphoid tissues after adoptive transfer.** The isolated OT-II cells were cocultured with OT-II peptide-pulsed DCs for 3-5 days. The cocultured OT-II cells ( $5 \times 10^6$ ) were harvested and labeled with 25 uM CFSE and adoptively transferred into naïve C57BL/6 mice by retro-orbital injection. 16 hrs after the adoptive transfer, migration of the labeled T cells to the mesenteric LNs, draining LNs, or spleen in the recipient mice was analyzed by flow cytometric assay.

**Supplementary Figure 4. Enhanced maturation of Ad-siA20-BM-DCs.** Maturation markers on Ad-siA20 or Ad-siGFP transduced BM-DCs without or with LPS stimulation (100 ng/ml for 18 hrs) were examined by flow cytometric assays. The experiment was repeated twice.

**Supplementary Figure 5. Survivability of Ad-siA20-transfected BM-DCs and endocytic activity of Ad-siA20-BM-DCs.** A. Mouse BM-DCs were transduced with Ad-siGFP or Ad-siA20 at MOI of 500. 24 hrs after transduction, the DCs were cultured in the presence or absence of LPS (100 ng/ml) for 18 hrs. The data of PI and Annexin V (BD Bioscience) staining

are presented from one of three repeated experiments. **B.** Endocytic activity of Ad-siA20-BM-DCs and Ad-siGFP-BM-DCs was measured by analysis of Dextran-Texas-Red (Invitrogen) internalization at 90 min after incubating at 4°C or at 37°C via flow cytometric assays.

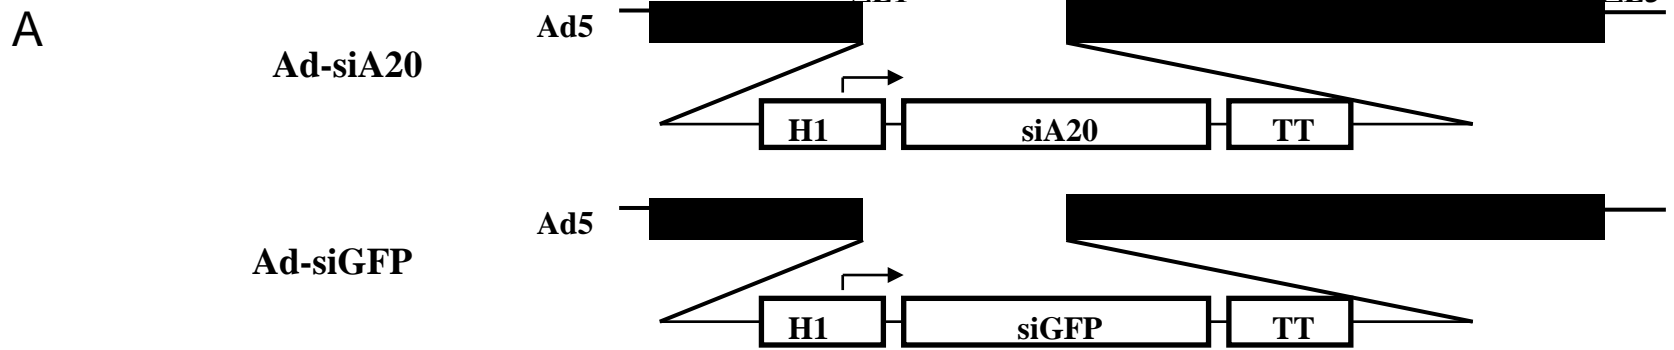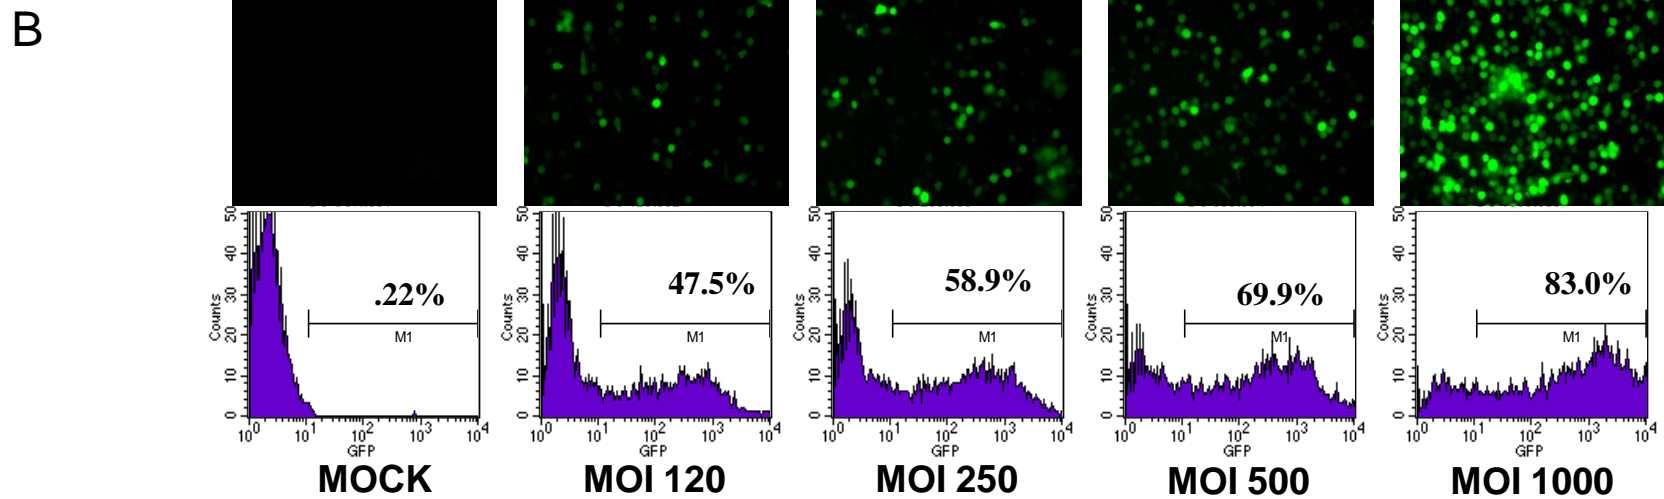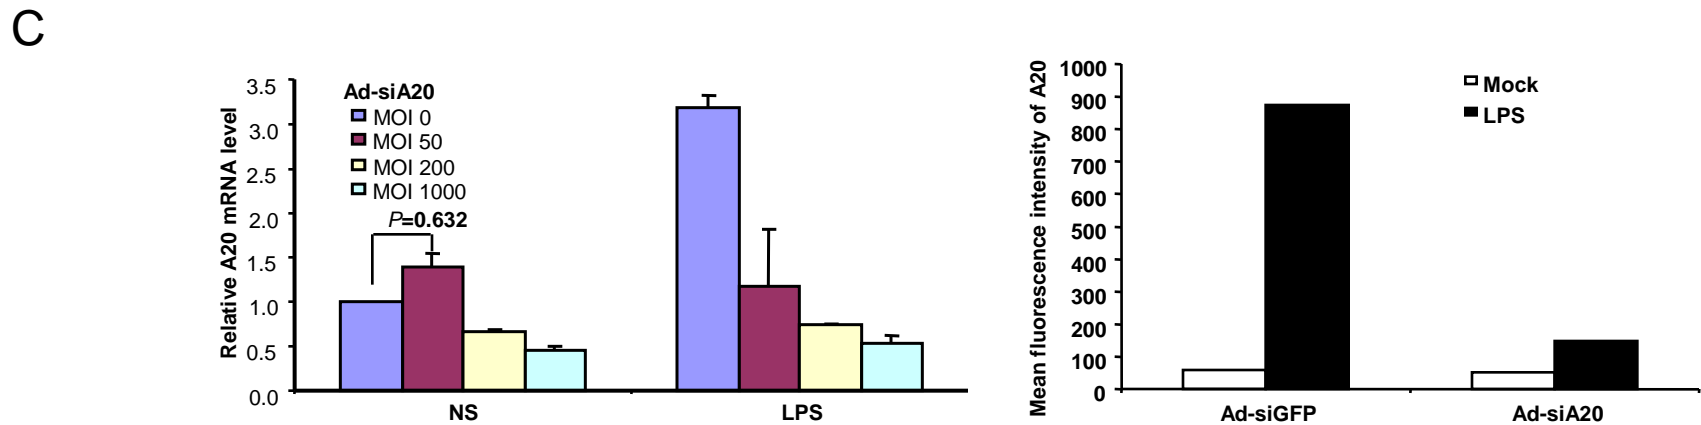

Supplementary Fig. S1

A

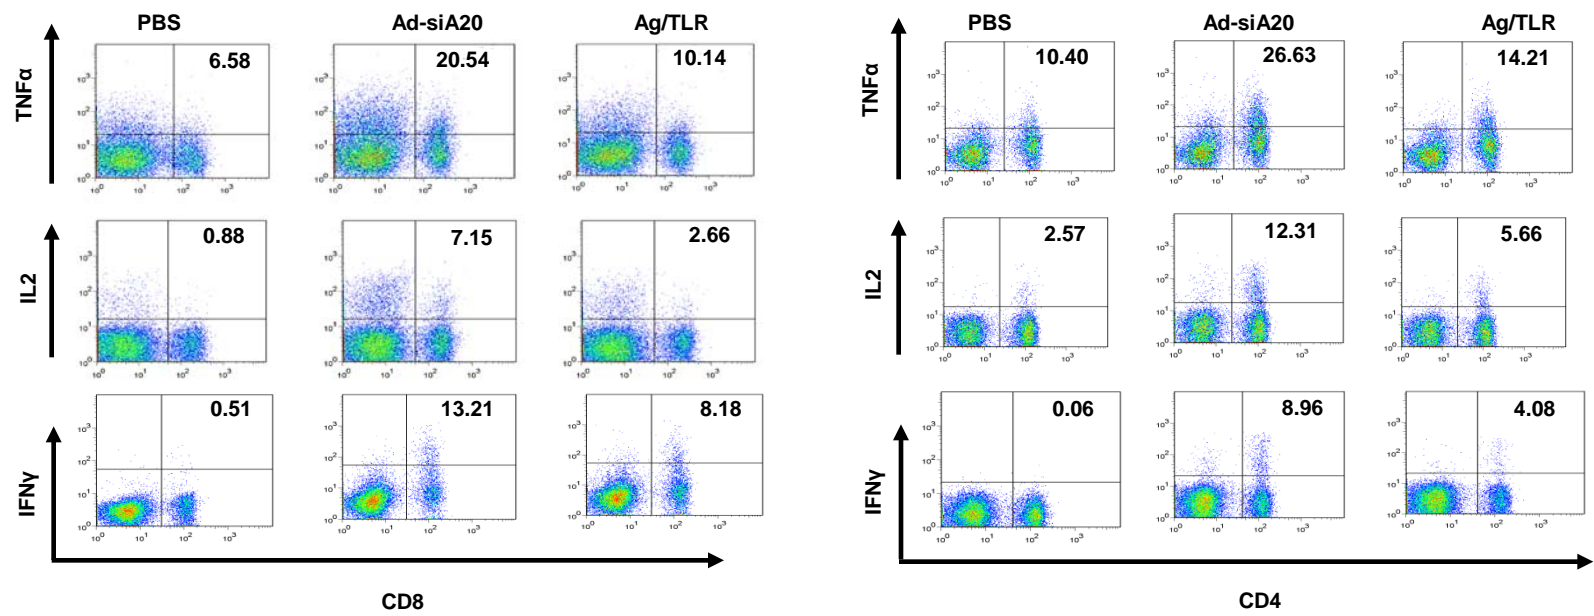

B

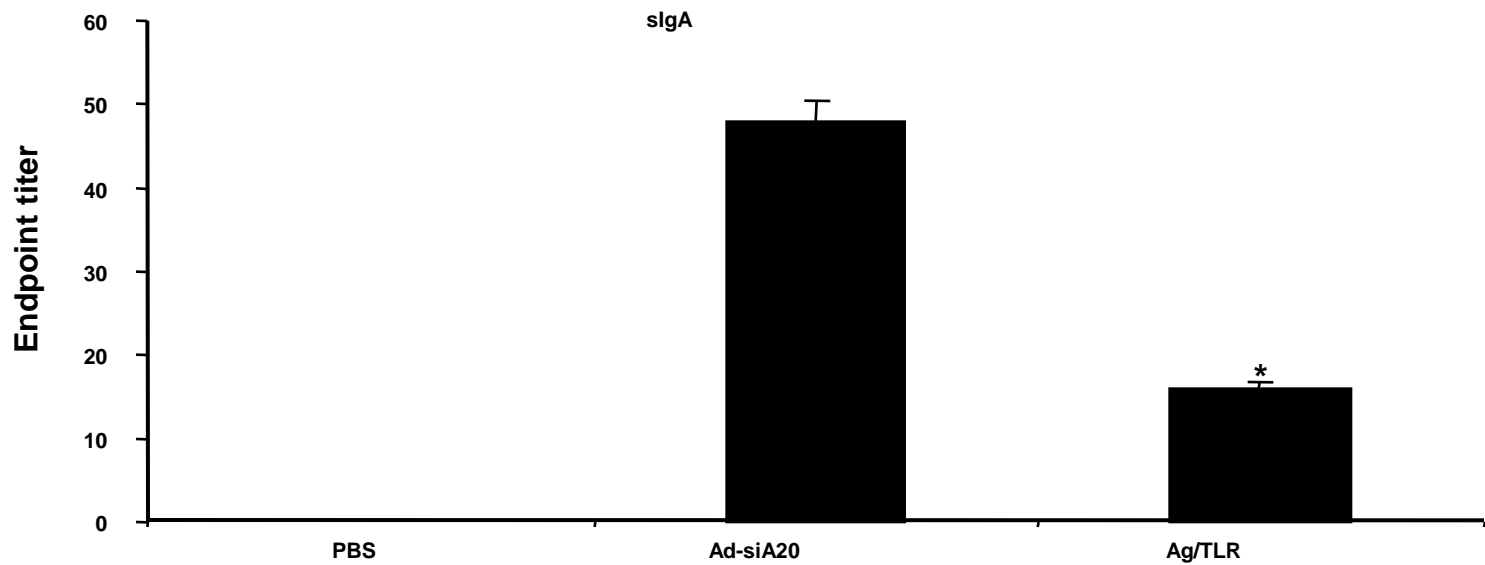

Fig. S2

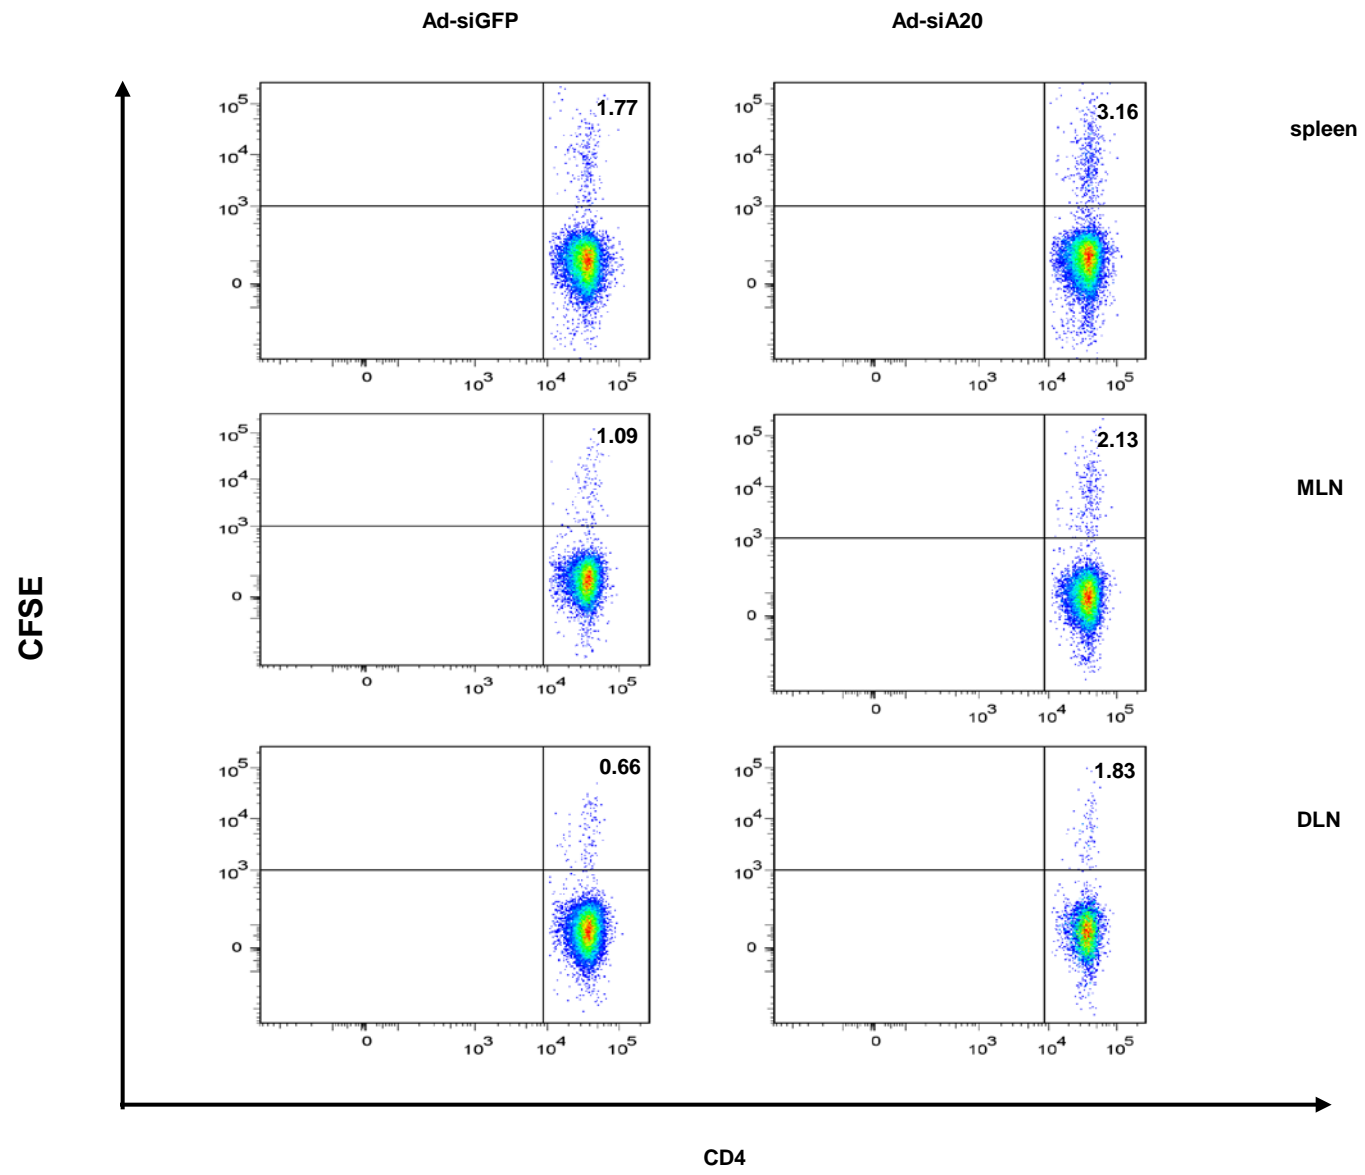

Fig. S3

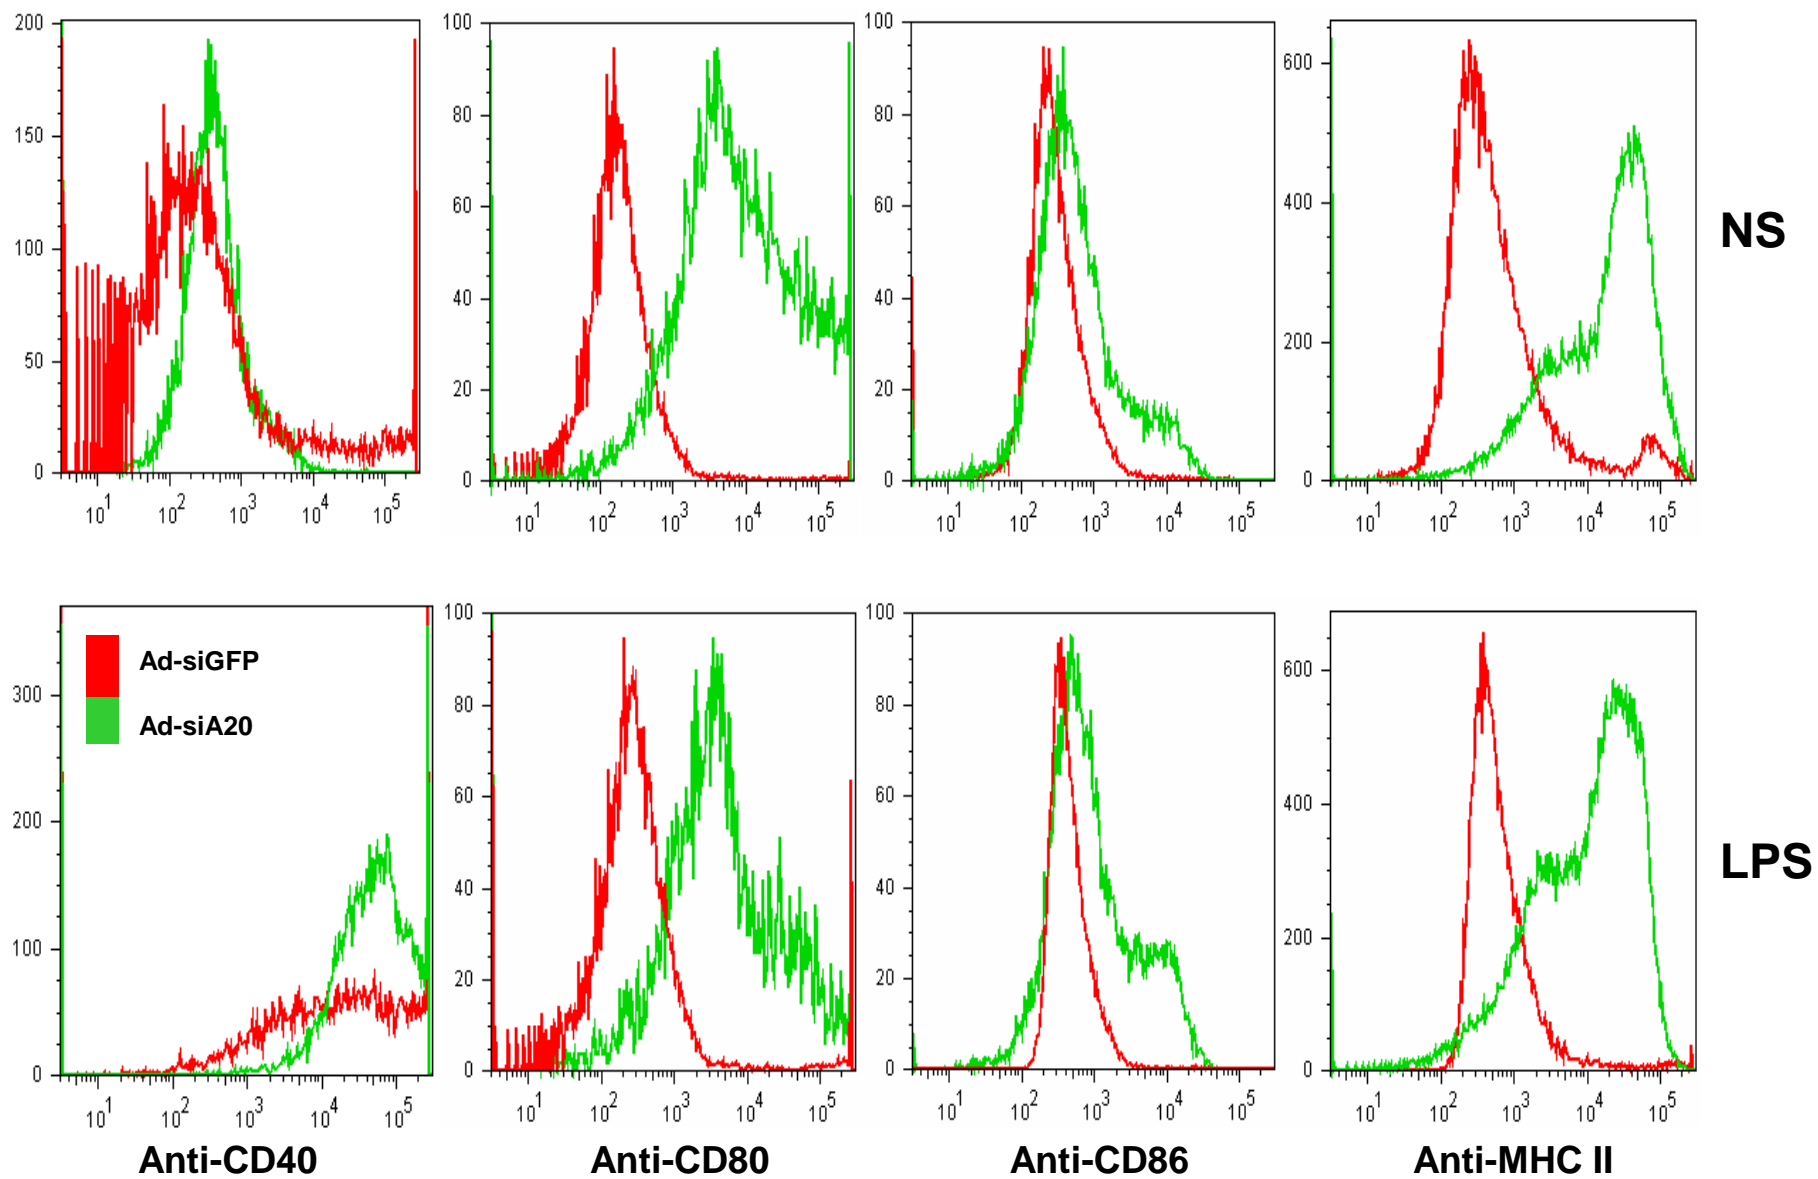

Fig. S4

A

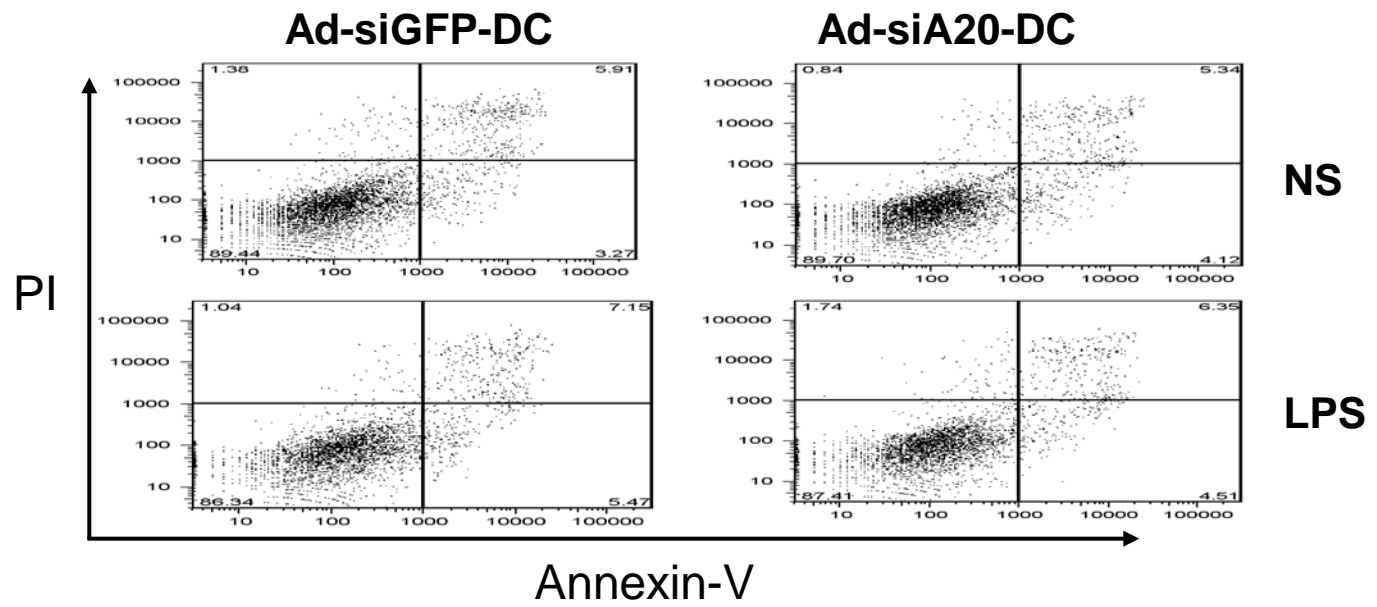

B

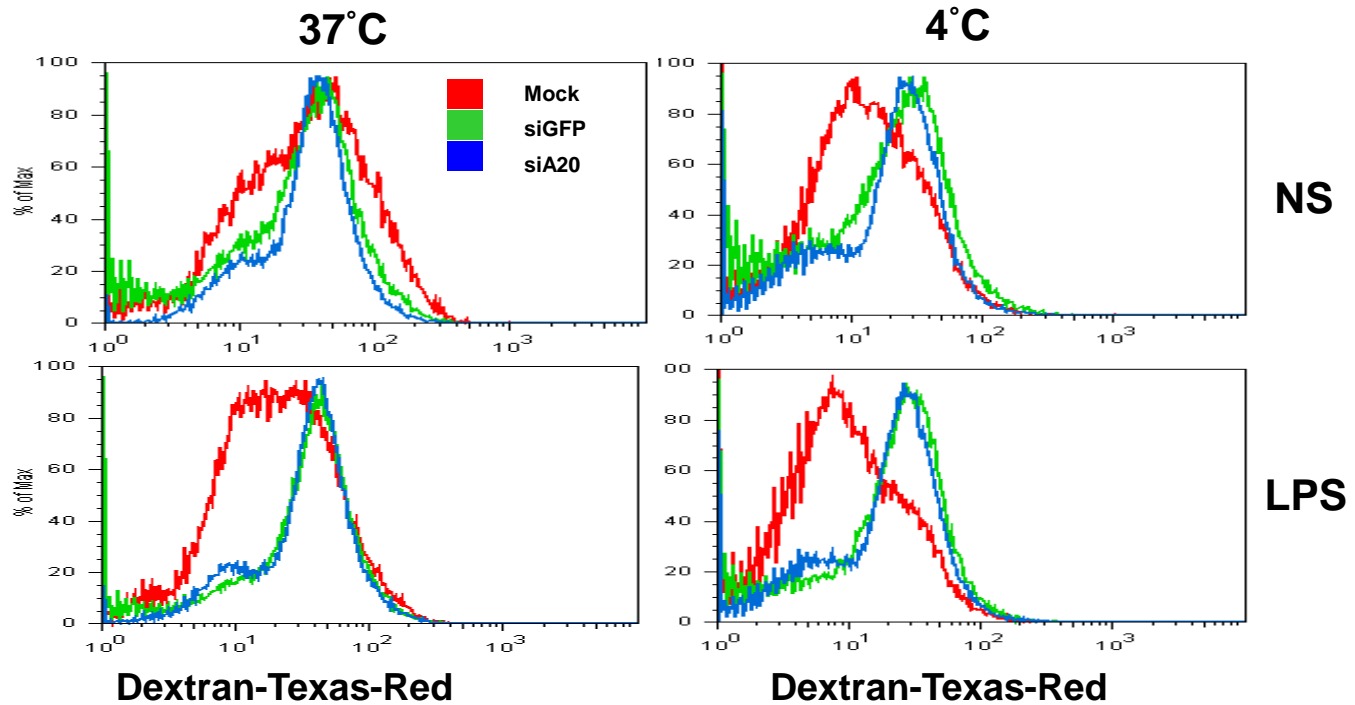

Fig. S5
